# Supplementary material for: Maternal Overweight vs. Polycystic Ovary Syndrome: Disentangling Their Impact on Insulin Action in Pregnancy—A Prospective Study
Source: MDPI journal article supplement (doi:10.3390/jcm10010035), 2020-12-24
Supplement: s1 [file s1]

## Supplemental Material

**Table S1.** Clinical characteristics and assessment of androgen status.

|                  | CONT-NW<br><i>n</i> = 29 | PCOS-NW<br><i>n</i> = 21 | CONT-OW<br><i>n</i> = 7 | PCOS-OW<br><i>n</i> = 10 |
|------------------|--------------------------|--------------------------|-------------------------|--------------------------|
| PCO-NIH          | -                        | 10 (47.6)                | -                       | 4 (40.0)                 |
| PCO-ROT          | -                        | 11 (52.4)                | -                       | 6 (60.0)                 |
| Tot-Test (ng/ml) | 0.53 (0.47–0.76)         | 0.67 (0.33–1.12)         | 0.79 (0.37–0.93)        | 0.92 (0.73–1.92)         |
| Bio-Test (ng/ml) | 0.03 (0.02–0.04)         | 0.03 (0.02–0.06)         | 0.04 (0.02–0.06)        | 0.04 (0.04–0.10)*        |
| SHBG (ng/ml)     | 481 (389–552)            | 392 (365–446)            | 338 (318–355)           | 364 (327–449)            |
| ANST (ng/ml)     | 4.21 (2.57–5.34)         | 4.37 (3.40–6.37)         | 3.61 (2.77–5.47)        | 4.96 (4.06–5.47)         |

Data are expressed as median and interquartile range. Four possible phenotypes of PCOS were summarized according to the NIH (PCO-NIH: phenotype A: ovulatory dysfunction + hyperandrogenism + polycystic ovaries or phenotype B: ovulatory dysfunction + hyperandrogenism) as well as the Rotterdam criteria, representing two classical and two newer phenotypes (PCOS-ROT; phenotype C: ovulatory dysfunction + polycystic ovary or phenotype D: hyperandrogenism + polycystic ovary). Tot-Test, total testosterone; Bio-Test, bioavailable testosterone; SHBG, sex hormone binding globulin; ANST, androstendione. \*  $p < 0.05$  vs. CONT-NW; †  $p < 0.05$  vs. PCOS-NW; §  $p < 0.05$  vs. CONT-OW/OB.

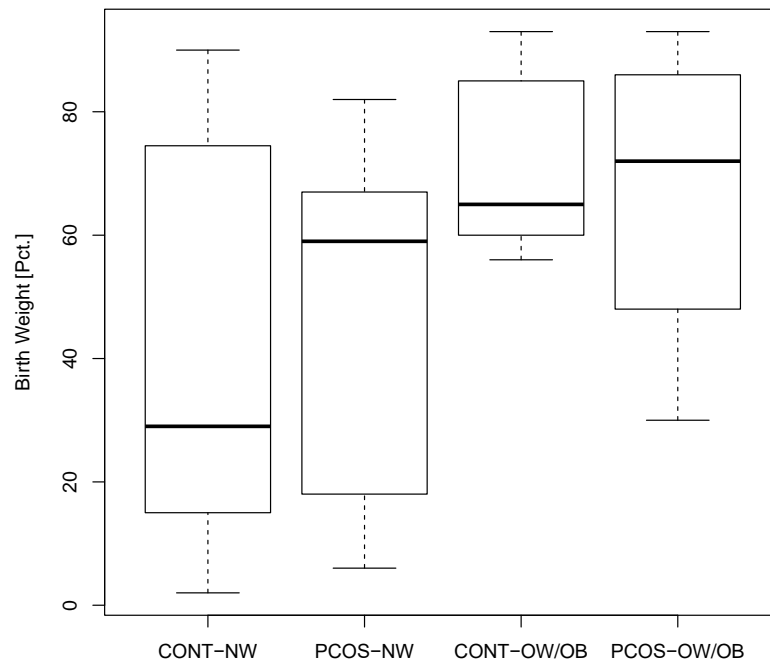

**Figure S1.** Birth weight percentiles. Abbreviations Figure 1: CONT-NW: normal weight controls; CONT-OW/OB: overweight or obese controls; PCOS-NW: normal weight PCOS; PCOS-OW/OB: overweight or obese PCOS; PREDIM: Predicted M
